# Supplementary material for: Green Synthesis of Nitrogen-Doped Carbon Quantum Dots from Medium-Molecular-Weight Chitosan for Ultrasensitive Fe³⁺ Detection and Responsive Probe
Source: Research Square preprint supplement (doi:10.21203/rs.3.rs-8120500/v1), 2025-12-08
Supplement: Supplementary file 1 [file e35617325484fe344c22e489.docx]

**Green Synthesis of Nitrogen-Doped Carbon Quantum Dots from Medium-Molecular-Weight Chitosan for Ultrasensitive Fe³⁺ Detection and Responsive Probe**

**Lulu Fenga, Hainan Lia, Zishuai Zhanga, Shuang Panga, Zhiyu Liua, Jiahao Linb, ,Shiyu Wanga,*,Zhenning Loub**

**a College of Physics, Liaoning University, Shenyang, 110036, China**

**b College of Chemistry, Liaoning University, Shenyang, 110036, China**

**E-mail: wangshiyu@lnu.edu.cn (Shiyu Wang)**

Section 1 Additional Characterization Data

Chitosan, derived exclusively from crab shells, served as the sole precursor material. The degree of deacetylation (DD) was determined via potentiometric titration by: (1) preparing 0.1 mol·L-1 NaOH standard solution through dissolution of 2.0 g NaOH in distilled water followed by dilution to 100 mL; (2) diluting 0.8 mL concentrated HCl to 100 mL with distilled water to obtain 0.1 mol·L-1 HCl standard solution; (3) dissolving a precisely weighed 30 g chitosan sample in 20 mL HCl solution under magnetic stirring; (4) titrating with NaOH standard solution while monitoring pH using a calibrated electrode; (5) plotting pH versus NaOH volume to generate the titration curve; and (6) constructing the first-derivative curve (ΔpH/ΔV vs. NaOH volume) to identify the equivalence point. The DD value was calculated as 100% using the standard formula .


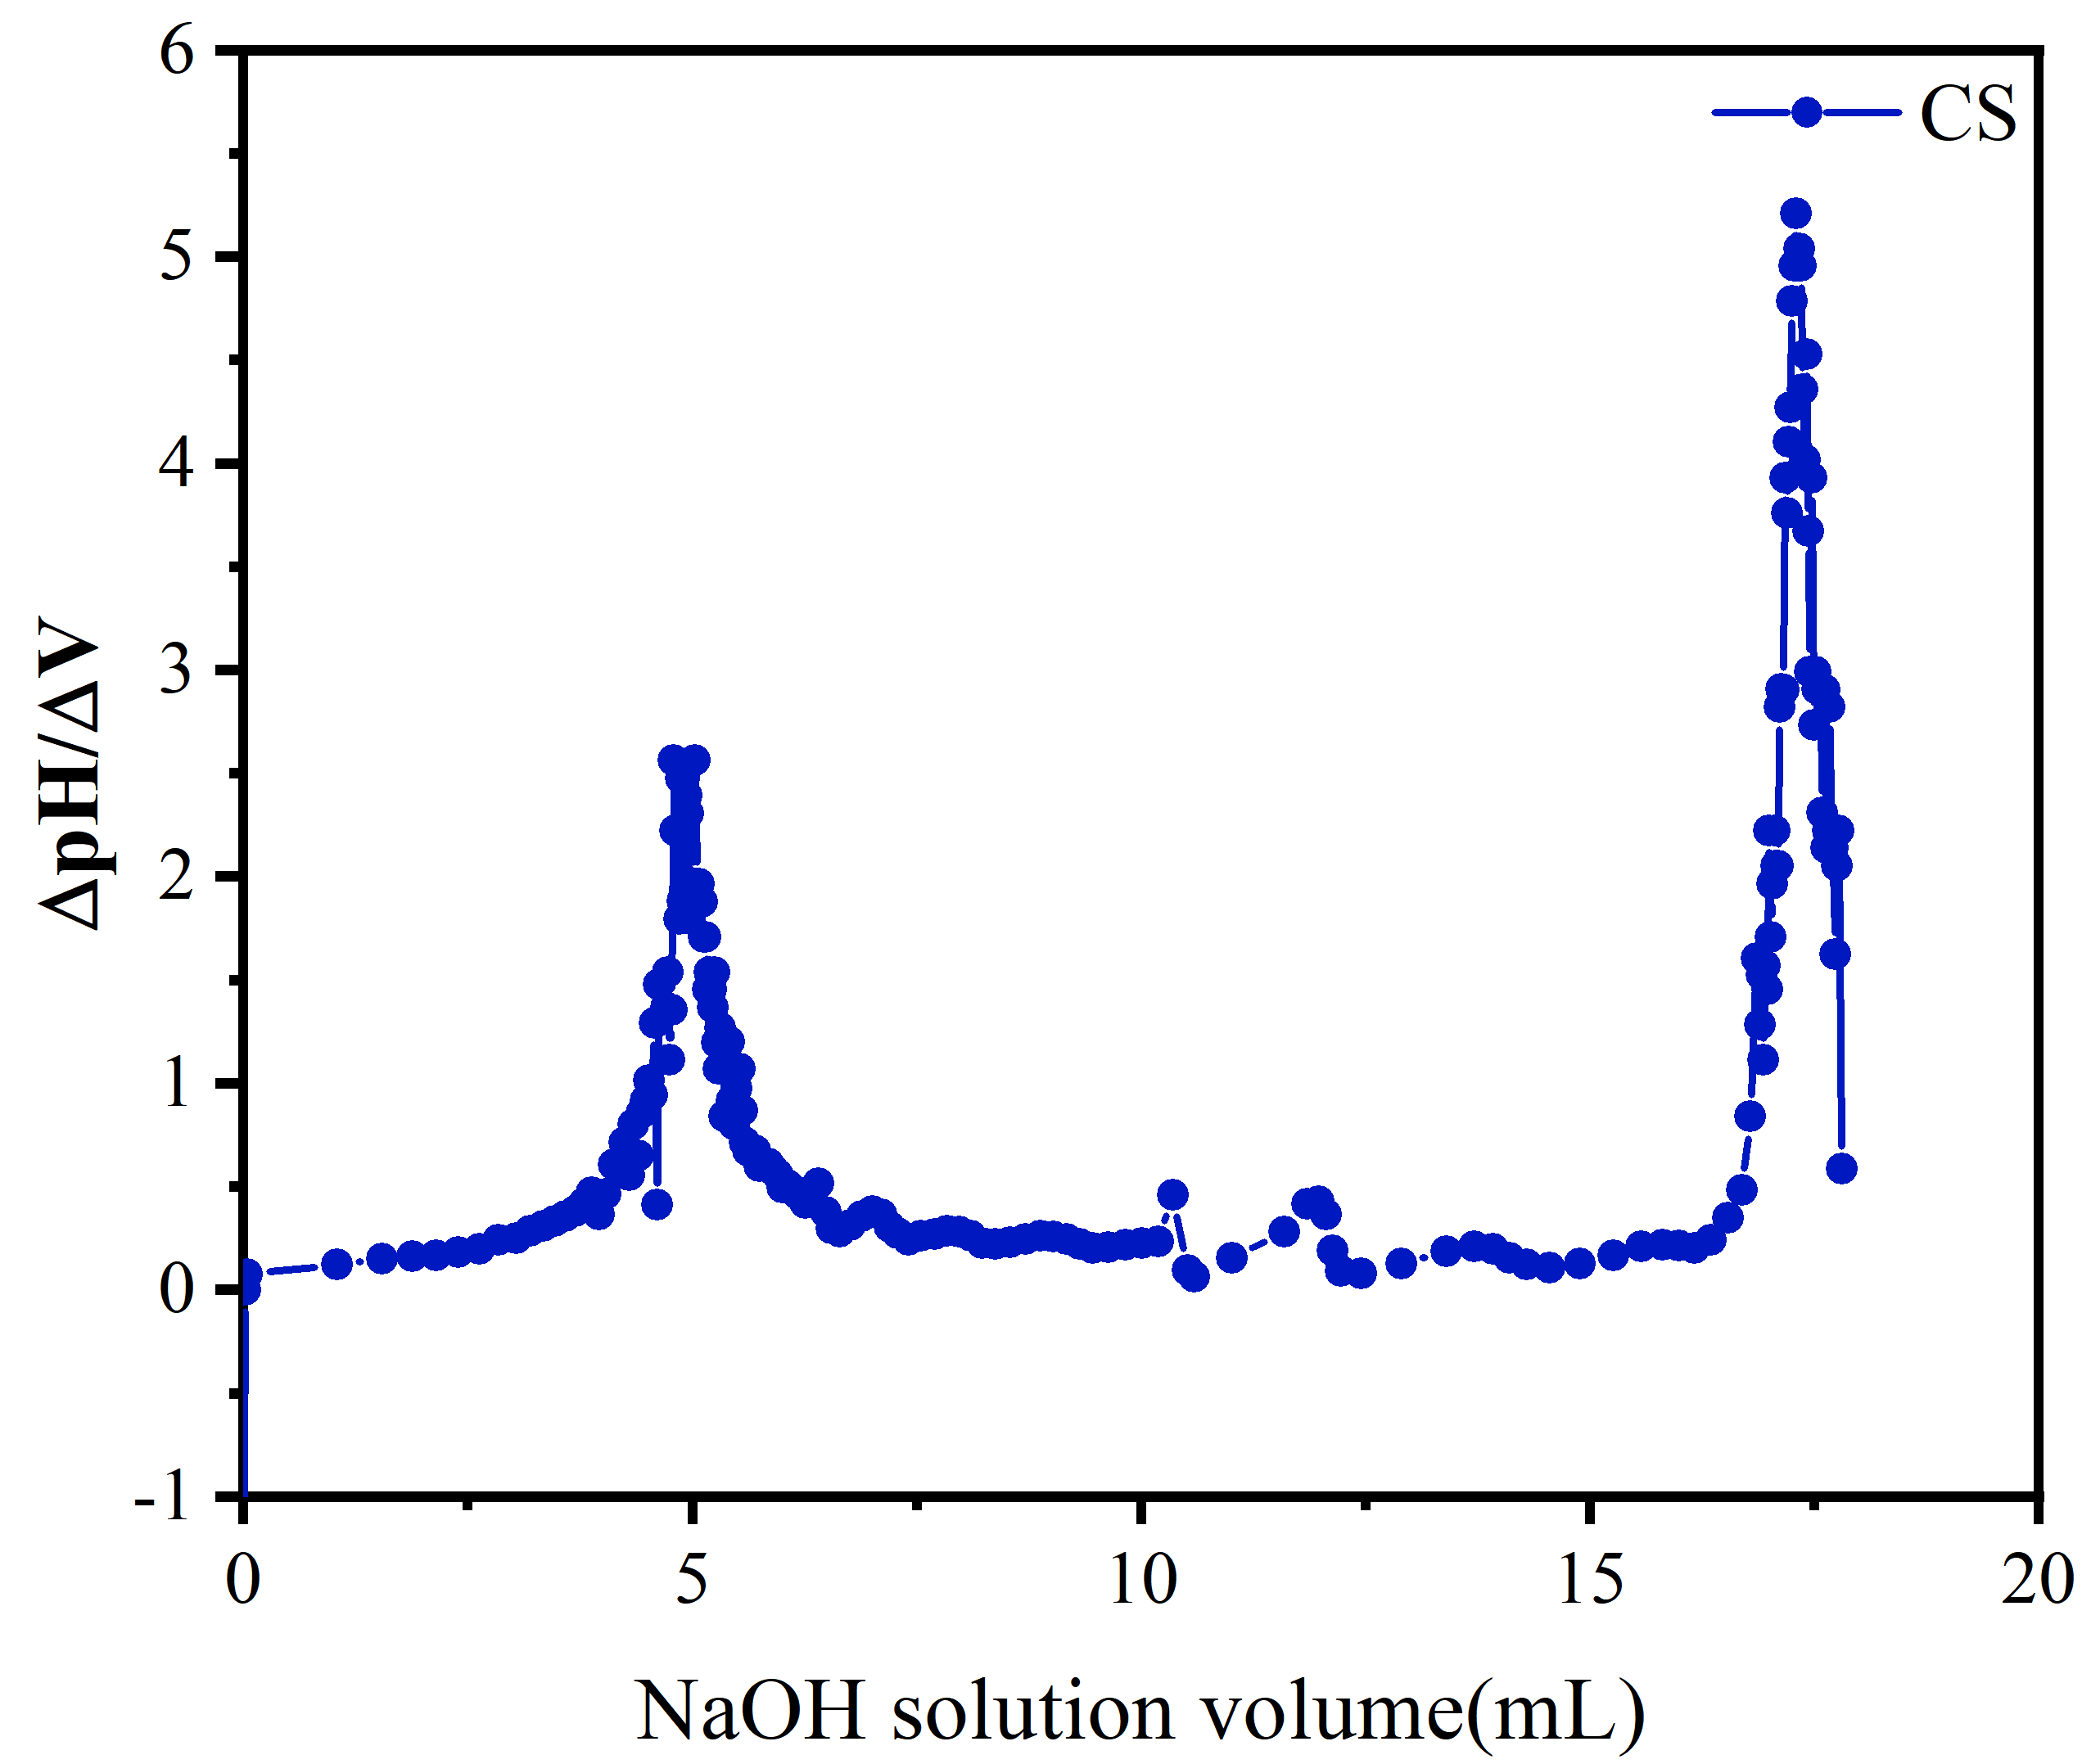


Fig.S1 Potentiometric titration test for the precursor material of chitosan.

Section 2 Additional Characterization Data

The molecular weight distribution of the chitosan precursor was evaluated by high-performance liquid chromatography (HPLC). Results indicate a highly uniform molecular weight profile centered at approximately 200 kDa, demonstrating narrow dispersity.


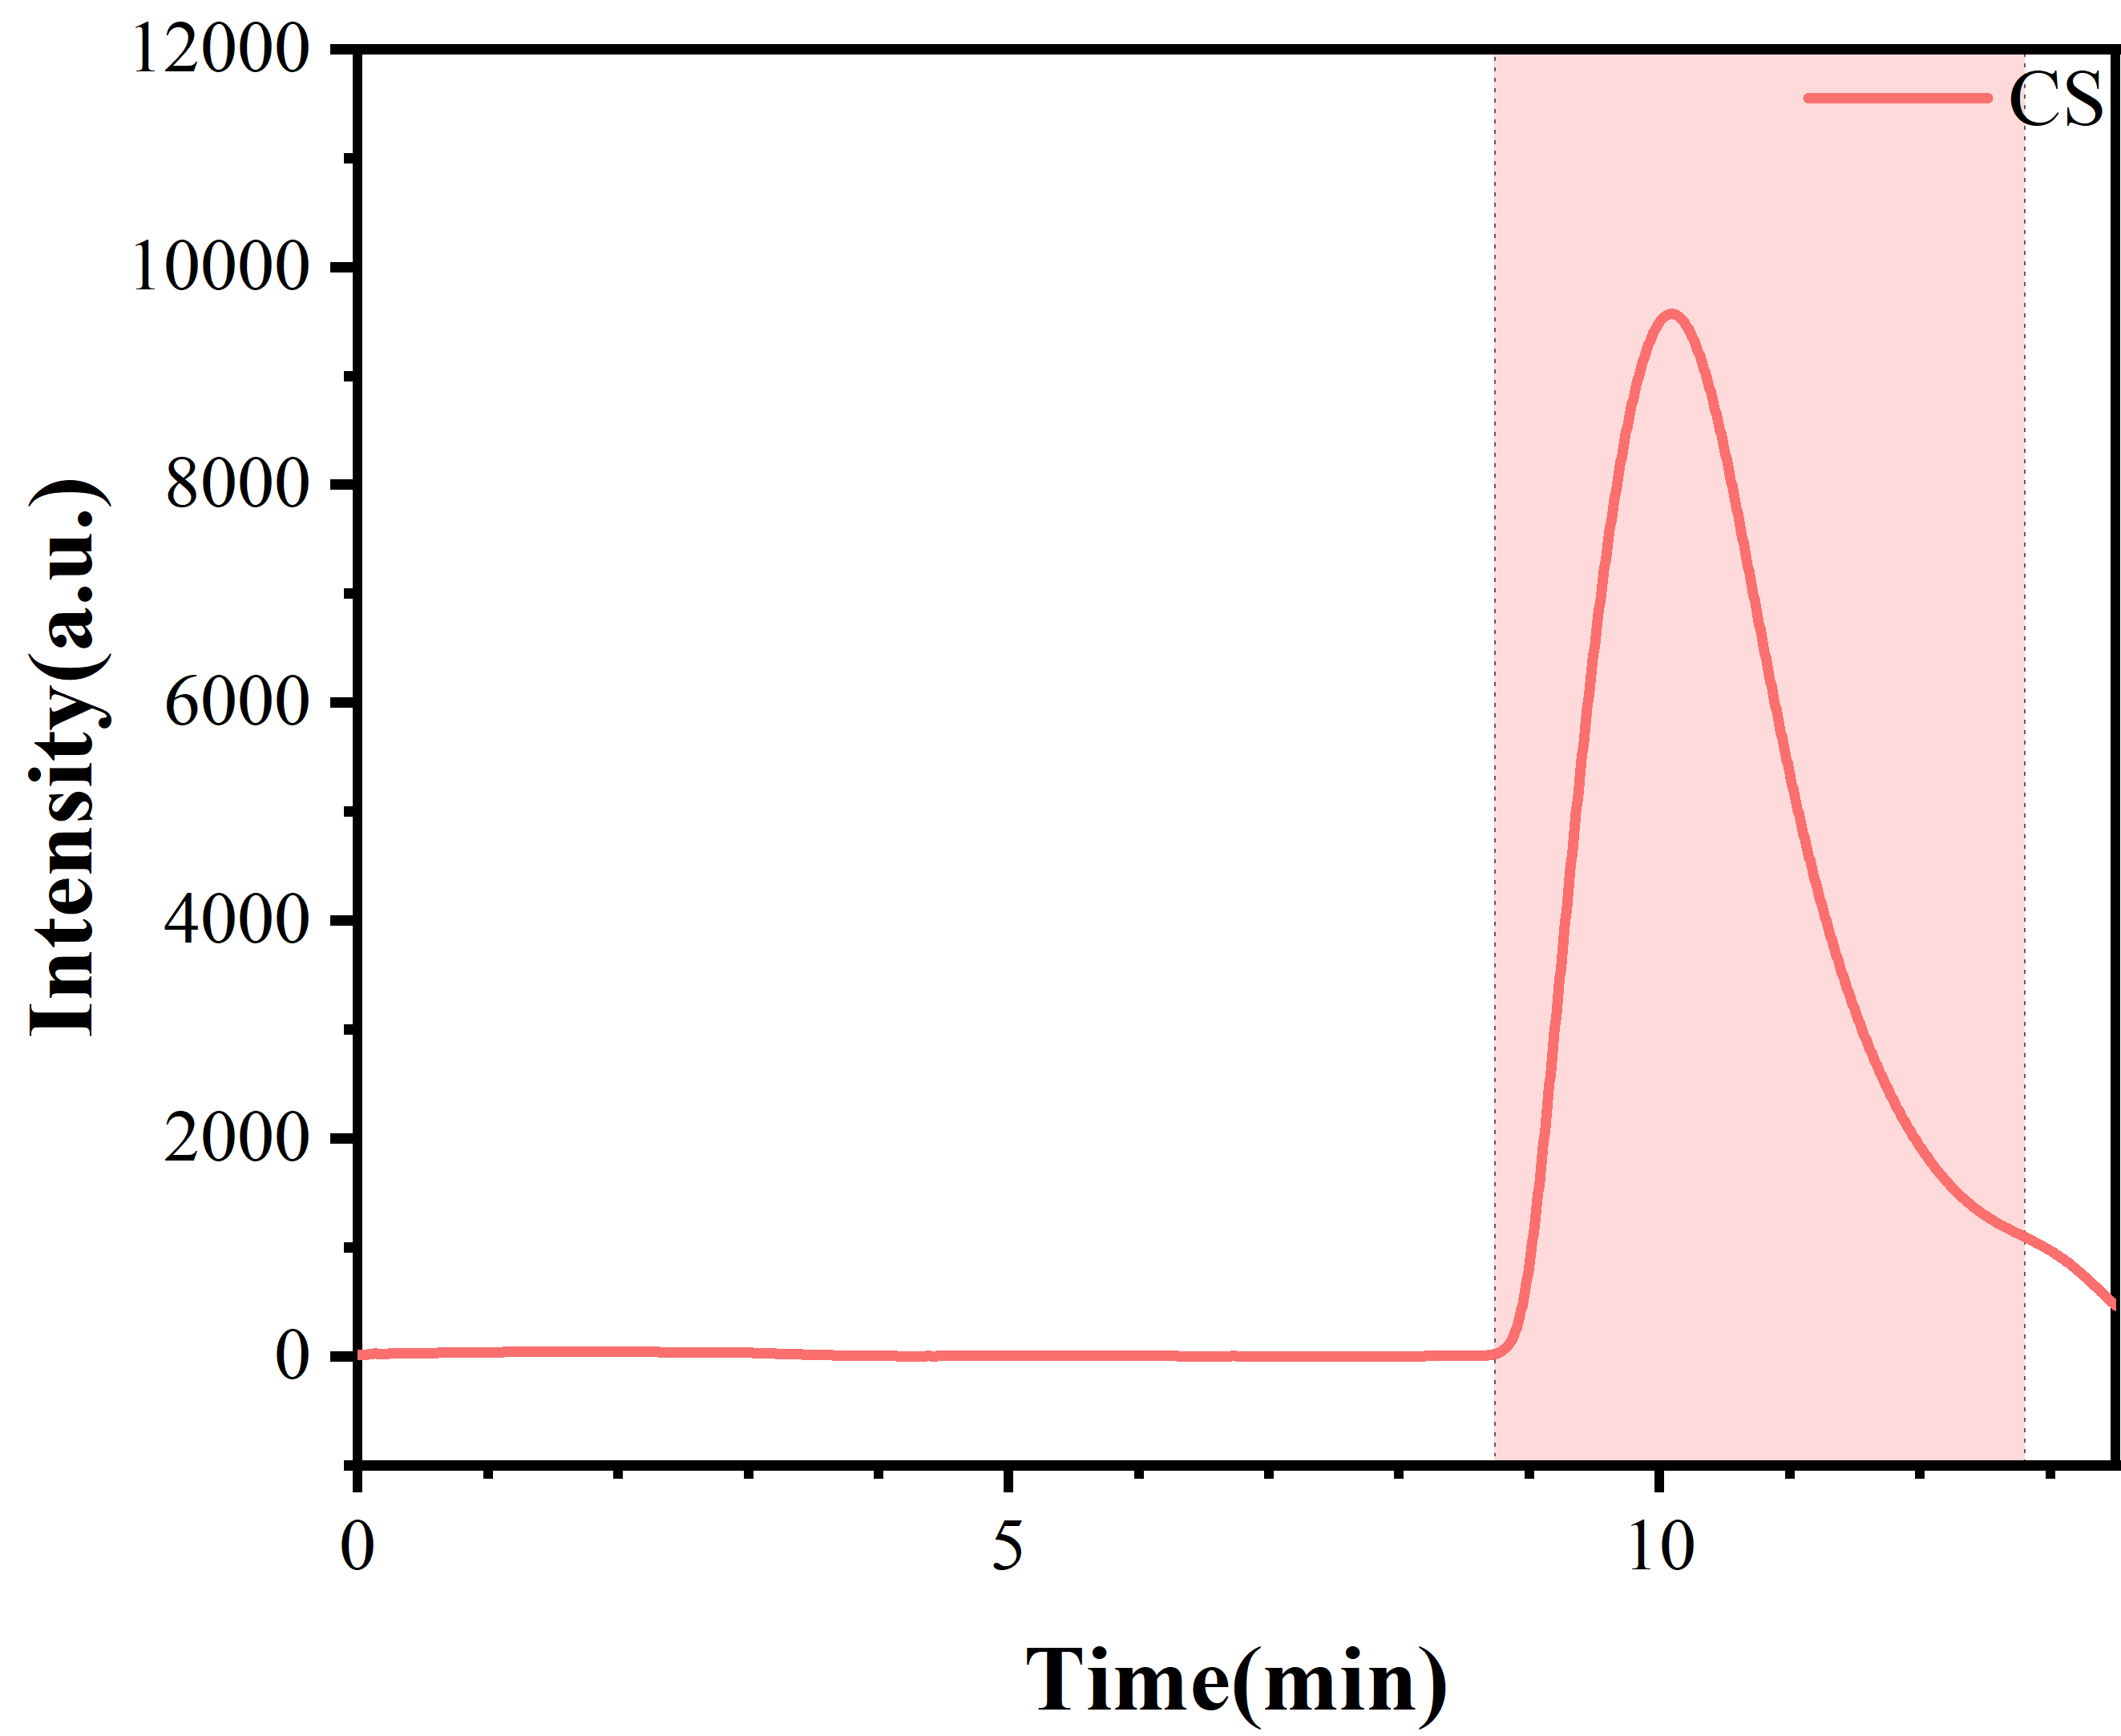


Fig.S2 High-performance liquid chromatography test for the precursor material of chitosan.
